# Supplementary material for: Tuning the Sensitivity and Dynamic Range of Optical Oxygen Sensing Films by Blending Various Polymer Matrices
Source: MDPI journal article supplement (doi:10.3390/bios12010005), 2021-12-22
Supplement: s1 [file s1]

# Tuning the Sensitivity and Dynamic Range of Optical Oxygen Sensing Films by Blending Various Polymer Matrices

Kaiheng Zhang <sup>1,2</sup>, Siyuan Lu <sup>1,2,\*</sup>, Zhe Qu <sup>2</sup> and Xue Feng <sup>3</sup>

<sup>1</sup> Part Rolling Key Laboratory of Zhejiang Province, School of Mechanical Engineering and Mechanics, Ningbo University, Ningbo 315211, China; geerheng086@gmail.com

<sup>2</sup> Institute of Flexible Electronics Technology of THU, Jiaxing 314000, China; quzhe\_2013@foxmail.com

<sup>3</sup> Department of Engineering Mechanics, Tsinghua University, Beijing 100084, China

\* Correspondence: lusiyan@nbu.edu.cn (S.L.); fengxue@tsinghua.edu.cn (X.F.)

## 1. Figure S1

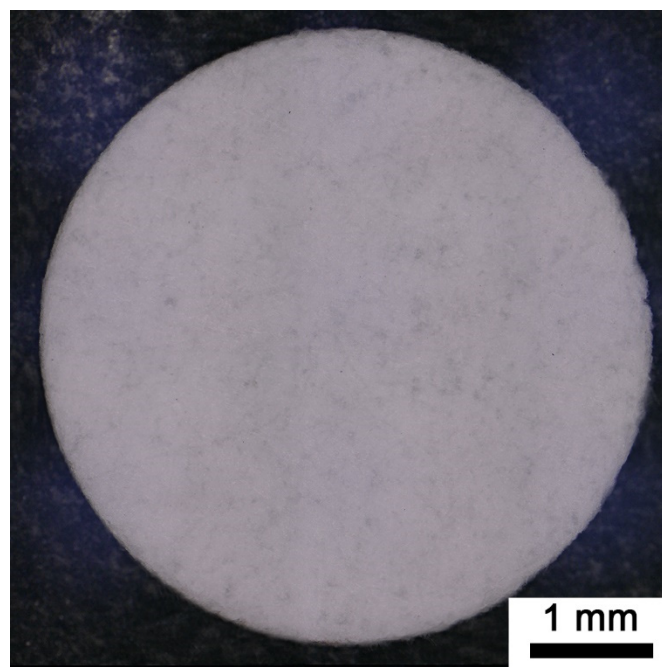

**Figure S1.** Optical image of microporous filter membrane.

## 2. Table S1

**Table S1.** Fitting parameters of hybrid quenching model for experimental sensing films at different temperatures.

| T (° C) |   | 10                     | 20                    | 30                    | 40                    | 50                    |
|---------|---|------------------------|-----------------------|-----------------------|-----------------------|-----------------------|
| Sample  | A | $9.05 \times 10^{-5}$  | $5.18 \times 10^{-4}$ | $2.01 \times 10^{-3}$ | $3.98 \times 10^{-3}$ | $1.15 \times 10^{-2}$ |
|         | B | 0.234                  | 0.283                 | 0.308                 | 0.342                 | 0.185                 |
| SF-EC   | C | 1.32                   | 1.33                  | 1.48                  | 1.56                  | 2.67                  |
|         | A | $-1.71 \times 10^{-5}$ | $2.39 \times 10^{-5}$ | $5.38 \times 10^{-5}$ | $9.99 \times 10^{-5}$ | $1.78 \times 10^{-4}$ |
|         | B | 0.0299                 | 0.0328                | 0.0409                | 0.0505                | 0.0623                |
| SF-E3P1 | C | 2.69                   | 2.76                  | 2.75                  | 2.71                  | 2.65                  |
|         | A | $8.22 \times 10^{-6}$  | $1.81 \times 10^{-5}$ | $1.61 \times 10^{-5}$ | $1.48 \times 10^{-5}$ | $4.35 \times 10^{-6}$ |
|         | B | 0.0230                 | 0.0259                | 0.0318                | 0.0374                | 0.0470                |
| SF-E1P1 | C | 1.69                   | 1.79                  | 1.80                  | 1.86                  | 1.92                  |
|         | A | $-1.16 \times 10^{-6}$ | $8.85 \times 10^{-6}$ | $2.19 \times 10^{-5}$ | $5.14 \times 10^{-5}$ | $8.60 \times 10^{-5}$ |
|         | C |                        |                       |                       |                       |                       |
| SF-E1P3 | A |                        |                       |                       |                       |                       |
|         | B |                        |                       |                       |                       |                       |
|         | C |                        |                       |                       |                       |                       |

---

|         |   |                        |                       |                       |                       |                       |
|---------|---|------------------------|-----------------------|-----------------------|-----------------------|-----------------------|
| SF-PMMA | B | 0.0194                 | 0.0205                | 0.0235                | 0.0276                | 0.0341                |
|         | C | 1.15                   | 1.17                  | 1.10                  | 1.22                  | 1.29                  |
|         | A | $-1.31 \times 10^{-5}$ | $3.76 \times 10^{-6}$ | $1.66 \times 10^{-5}$ | $4.10 \times 10^{-5}$ | $7.71 \times 10^{-5}$ |
|         | B | 0.0168                 | 0.0179                | 0.0200                | 0.0226                | 0.0267                |
|         | C | 1.02                   | 1.01                  | 1.03                  | 1.05                  | 1.07                  |
|         |   |                        |                       |                       |                       |                       |

---
